# Supplementary material for: A mobile genetic element increases bacterial host fitness by manipulating development
Source: eLife. 2021 Mar 3;10:e65924. doi: 10.7554/eLife.65924 (PMC8032392; doi:10.7554/eLife.65924)
Supplement: Figure 2—source data 1. — Counts of ICEBs1-containing and ICEBs1-cured cells at start and end of competitions on biofilm and sporulation growth medium. [file elife-65924-fig2-data1.xlsx]

## Sheet: Figure 2A-D
Figure 2A, 2C (biofilms)
Replicate 1 2019.03.27
	Initial ICE+ CFU/ml (plating rep 1)	Initial ICE0 CFU/ml (plating rep 1)	Initial ICE+ CFU/ml (plating rep 2)	Initial ICE0 CFU/ml (plating rep 2)	Avg. Initial ICE+ frequency	Final ICE+ (CFU/ml)	Final ICE0 (CFU/ml)	Total CFU/ml	Final ICE+ frequency	ICE+ Relative fitness
JMJ593 0.01 JMJ550 0.99 MSgg biofilm rep 1	12200	1480000	12200	1840000	0.0073813	70000000	1720000000	1790000000	0.0391061	5.47292
JMJ593 0.01 JMJ550 0.99 MSgg biofilm rep 2	12200	1480000	12200	1840000	0.0073813	72000000	2120000000	2192000000	0.0328467	4.56716
JMJ593 0.01 JMJ550 0.99 MSgg biofilm rep 3	12200	1480000	12200	1840000	0.0073813	38000000	1680000000	1718000000	0.0221187	3.04175
JMJ593 0.1 JMJ550 0.9 MSgg biofilm rep 1	111000	1510000	147000	1610000	0.0760708	214000000	1780000000	1994000000	0.107322	1.46021
JMJ593 0.1 JMJ550 0.9 MSgg biofilm rep 2	111000	1510000	147000	1610000	0.0760708	184000000	1420000000	1604000000	0.114713	1.5738
JMJ593 0.1 JMJ550 0.9 MSgg biofilm rep 3	111000	1510000	147000	1610000	0.0760708	178000000	1700000000	1878000000	0.0947817	1.27172
JMJ593 0.5 JMJ550 0.5 MSgg biofilm rep 1	630000	920000	570000	760000	0.417512	680000000	1140000000	1820000000	0.373626	0.832191
JMJ593 0.5 JMJ550 0.5 MSgg biofilm rep 2	630000	920000	570000	760000	0.417512	760000000	900000000	1660000000	0.457831	1.17812
JMJ593 0.5 JMJ550 0.5 MSgg biofilm rep 3	630000	920000	570000	760000	0.417512	690000000	1000000000	1690000000	0.408284	0.962649
JMJ593 0.9 JMJ550 0.1 MSgg biofilm rep 1	810000	176000	970000	185000	0.830664	1560000000	259000000	1819000000	0.857614	1.22786
JMJ593 0.9 JMJ550 0.1 MSgg biofilm rep 2	810000	176000	970000	185000	0.830664	1640000000	244000000	1884000000	0.870488	1.37018
JMJ593 0.9 JMJ550 0.1 MSgg biofilm rep 3	810000	176000	970000	185000	0.830664	1720000000	338000000	2058000000	0.835763	1.03738
Replicate 2 2019.03.28
	Initial ICE+ CFU/ml (plating rep 1)	Initial ICE0 CFU/ml (plating rep 1)	Initial ICE+ CFU/ml (plating rep 2)	Initial ICE0 CFU/ml (plating rep 2)	Avg. Initial ICE+ frequency	Final ICE+ (CFU/ml)	Final ICE0 (CFU/ml)	Total CFU/ml	Final ICE+ frequency	ICE+ Relative fitness
JMJ593 0.01 JMJ550 0.99 MSgg biofilm rep 1	2800	240000	2200	240000	0.0103078	42000000	1520000000	1562000000	0.0268886	2.65303
JMJ593 0.01 JMJ550 0.99 MSgg biofilm rep 2	2800	240000	2200	240000	0.0103078	38000000	1970000000	2008000000	0.0189243	1.85205
JMJ593 0.01 JMJ550 0.99 MSgg biofilm rep 3	2800	240000	2200	240000	0.0103078	36000000	1720000000	1756000000	0.0205011	2.0096
JMJ593 0.1 JMJ550 0.9 MSgg biofilm rep 1	13000	190000	11000	160000	0.0641834	172000000	1390000000	1562000000	0.110115	1.80419
JMJ593 0.1 JMJ550 0.9 MSgg biofilm rep 2	13000	190000	11000	160000	0.0641834	167000000	1430000000	1597000000	0.104571	1.70274
JMJ593 0.1 JMJ550 0.9 MSgg biofilm rep 3	13000	190000	11000	160000	0.0641834	181000000	1270000000	1451000000	0.124742	2.07799
JMJ593 0.5 JMJ550 0.5 MSgg biofilm rep 1	58000	97000	67000	66000	0.438976	660000000	1550000000	2210000000	0.298643	0.544192
JMJ593 0.5 JMJ550 0.5 MSgg biofilm rep 2	58000	97000	67000	66000	0.438976	620000000	1180000000	1800000000	0.344444	0.671505
JMJ593 0.5 JMJ550 0.5 MSgg biofilm rep 3	58000	97000	67000	66000	0.438976	600000000	1070000000	1670000000	0.359281	0.71665
JMJ593 0.9 JMJ550 0.1 MSgg biofilm rep 1	120000	15000	60000	19000	0.824191	1240000000	340000000	1580000000	0.78481	0.777956
JMJ593 0.9 JMJ550 0.1 MSgg biofilm rep 2	120000	15000	60000	19000	0.824191	1060000000	360000000	1420000000	0.746479	0.628081
JMJ593 0.9 JMJ550 0.1 MSgg biofilm rep 3	120000	15000	60000	19000	0.824191	1490000000	320000000	1810000000	0.823204	0.993227
Replicate 3 2019.03.29
	Initial ICE+ CFU/ml (plating rep 1)	Initial ICE0 CFU/ml (plating rep 1)	Initial ICE+ CFU/ml (plating rep 2)	Initial ICE0 CFU/ml (plating rep 2)	Avg. Initial ICE+ frequency	Final ICE+ (CFU/ml)	Final ICE0 (CFU/ml)	Total CFU/ml	Final ICE+ frequency	ICE+ Relative fitness
JMJ593 0.01 JMJ550 0.99 MSgg biofilm rep 1	11200	810000	13200	790000	0.0150364	51000000	1700000000	1751000000	0.0291262	1.96516
JMJ593 0.01 JMJ550 0.99 MSgg biofilm rep 2	11200	810000	13200	790000	0.0150364	41000000	1960000000	2001000000	0.0204898	1.37026
JMJ593 0.01 JMJ550 0.99 MSgg biofilm rep 3	11200	810000	13200	790000	0.0150364	60000000	1980000000	2040000000	0.0294118	1.98501
JMJ593 0.1 JMJ550 0.9 MSgg biofilm rep 1	89000	670000	87000	800000	0.107671	202000000	1610000000	1812000000	0.111479	1.0398
JMJ593 0.1 JMJ550 0.9 MSgg biofilm rep 2	89000	670000	87000	800000	0.107671	153000000	1440000000	1593000000	0.0960452	0.880548
JMJ593 0.1 JMJ550 0.9 MSgg biofilm rep 3	89000	670000	87000	800000	0.107671	162000000	1740000000	1902000000	0.0851735	0.771596
JMJ593 0.5 JMJ550 0.5 MSgg biofilm rep 1	470000	350000	310000	470000	0.485303	770000000	1710000000	2480000000	0.310484	0.477565
JMJ593 0.5 JMJ550 0.5 MSgg biofilm rep 2	470000	350000	310000	470000	0.485303	650000000	1350000000	2000000000	0.325	0.510643
JMJ593 0.5 JMJ550 0.5 MSgg biofilm rep 3	470000	350000	310000	470000	0.485303	670000000	1380000000	2050000000	0.326829	0.514913
JMJ593 0.9 JMJ550 0.1 MSgg biofilm rep 1	710000	65000	610000	65000	0.909916	1440000000	340000000	1780000000	0.808989	0.419303
JMJ593 0.9 JMJ550 0.1 MSgg biofilm rep 2	710000	65000	610000	65000	0.909916	1520000000	280000000	1800000000	0.844444	0.53744
JMJ593 0.9 JMJ550 0.1 MSgg biofilm rep 3	710000	65000	610000	65000	0.909916	1520000000	380000000	1900000000	0.8	0.396008
Figure 2B, 2D (sporulation)
Replicate 1 2019.07.12
	Initial ICE+ CFU/ml (plating rep 1)	Initial ICE0 CFU/ml (plating rep 1)	Initial ICE+ CFU/ml (plating rep 2)	Initial ICE0 CFU/ml (plating rep 2)	Avg. Initial ICE+ frequency	Final ICE+ (CFU/ml)	Final ICE0 (CFU/ml)	Total CFU/ml	Final ICE+ frequency	ICE+ Relative fitness
JMJ593 0.01 JMJ550 0.99 DSM colony rep 1	34000	3600000	40000	3100000	0.0110475	89000000	820000000	909000000	0.0979098	9.71603
JMJ593 0.01 JMJ550 0.99 DSM colony rep 2	34000	3600000	40000	3100000	0.0110475	149000000	760000000	909000000	0.163916	17.5503
JMJ593 0.01 JMJ550 0.99 DSM colony rep 3	34000	3600000	40000	3100000	0.0110475	120000000	680000000	800000000	0.15	15.7974
JMJ593 0.1 JMJ550 0.9 DSM colony rep 1	294000	2980000	302000	2810000	0.0934211	238000000	720000000	958000000	0.248434	3.20779
JMJ593 0.1 JMJ550 0.9 DSM colony rep 2	294000	2980000	302000	2810000	0.0934211	194000000	590000000	784000000	0.247449	3.19088
JMJ593 0.1 JMJ550 0.9 DSM colony rep 3	294000	2980000	302000	2810000	0.0934211	226000000	710000000	936000000	0.241453	3.08895
JMJ593 0.5 JMJ550 0.5 DSM colony rep 1	1450000	1460000	1680000	1430000	0.519237	560000000	350000000	910000000	0.615385	1.48144
JMJ593 0.5 JMJ550 0.5 DSM colony rep 2	1450000	1460000	1680000	1430000	0.519237	500000000	320000000	820000000	0.609756	1.44672
JMJ593 0.5 JMJ550 0.5 DSM colony rep 3	1450000	1460000	1680000	1430000	0.519237	420000000	295000000	715000000	0.587413	1.31823
JMJ593 0.9 JMJ550 0.1 DSM colony rep 1	2870000	244000	2740000	280000	0.914464	680000000	83000000	763000000	0.891219	0.766321
JMJ593 0.9 JMJ550 0.1 DSM colony rep 2	2870000	244000	2740000	280000	0.914464	670000000	84000000	754000000	0.888594	0.746062
JMJ593 0.9 JMJ550 0.1 DSM colony rep 3	2870000	244000	2740000	280000	0.914464	710000000	73000000	783000000	0.906769	0.909736
Replicate 2 2019.07.13
	Initial ICE+ CFU/ml (plating rep 1)	Initial ICE0 CFU/ml (plating rep 1)	Initial ICE+ CFU/ml (plating rep 2)	Initial ICE0 CFU/ml (plating rep 2)	Avg. Initial ICE+ frequency	Final ICE+ (CFU/ml)	Final ICE0 (CFU/ml)	Total CFU/ml	Final ICE+ frequency	ICE+ Relative fitness
JMJ593 0.01 JMJ550 0.99 DSM colony rep 1	43000	3000000	53000	4500000	0.0128857	58000000	660000000	718000000	0.0807799	6.73197
JMJ593 0.01 JMJ550 0.99 DSM colony rep 2	43000	3000000	53000	4500000	0.0128857	120000000	650000000	770000000	0.155844	14.1425
JMJ593 0.01 JMJ550 0.99 DSM colony rep 3	43000	3000000	53000	4500000	0.0128857	130000000	630000000	760000000	0.171053	15.8074
JMJ593 0.1 JMJ550 0.9 DSM colony rep 1	330000	2700000	340000	3300000	0.101159	140000000	570000000	710000000	0.197183	2.18239
JMJ593 0.1 JMJ550 0.9 DSM colony rep 2	330000	2700000	340000	3300000	0.101159	155000000	570000000	725000000	0.213793	2.41622
JMJ593 0.1 JMJ550 0.9 DSM colony rep 3	330000	2700000	340000	3300000	0.101159	139000000	750000000	889000000	0.156355	1.64677
JMJ593 0.5 JMJ550 0.5 DSM colony rep 1	1880000	1380000	1780000	1590000	0.552439	560000000	350000000	910000000	0.615385	1.29625
JMJ593 0.5 JMJ550 0.5 DSM colony rep 2	1880000	1380000	1780000	1590000	0.552439	510000000	252000000	762000000	0.669291	1.6396
JMJ593 0.5 JMJ550 0.5 DSM colony rep 3	1880000	1380000	1780000	1590000	0.552439	460000000	310000000	770000000	0.597403	1.20217
JMJ593 0.9 JMJ550 0.1 DSM colony rep 1	3900000	268000	3800000	277000	0.933879	800000000	82000000	882000000	0.907029	0.690754
JMJ593 0.9 JMJ550 0.1 DSM colony rep 2	3900000	268000	3800000	277000	0.933879	820000000	42000000	862000000	0.951276	1.38233
JMJ593 0.9 JMJ550 0.1 DSM colony rep 3	3900000	268000	3800000	277000	0.933879	740000000	46000000	786000000	0.941476	1.13899
Replicate 3 2019.07.15
	Initial ICE+ CFU/ml (plating rep 1)	Initial ICE0 CFU/ml (plating rep 1)	Initial ICE+ CFU/ml (plating rep 2)	Initial ICE0 CFU/ml (plating rep 2)	Avg. Initial ICE+ frequency	Final ICE+ (CFU/ml)	Final ICE0 (CFU/ml)	Total CFU/ml	Final ICE+ frequency	ICE+ Relative fitness
JMJ593 0.01 JMJ550 0.99 DSM colony rep 1	23800	1270000	24100	1470000	0.0172628	79000000	570000000	649000000	0.121726	7.89004
JMJ593 0.01 JMJ550 0.99 DSM colony rep 2	23800	1270000	24100	1470000	0.0172628	229000000	700000000	929000000	0.246502	18.6236
JMJ593 0.01 JMJ550 0.99 DSM colony rep 3	23800	1270000	24100	1470000	0.0172628	145000000	570000000	715000000	0.202797	14.4817
JMJ593 0.1 JMJ550 0.9 DSM colony rep 1	243000	1200000	200000	1150000	0.158274	160000000	690000000	850000000	0.188235	1.2332
JMJ593 0.1 JMJ550 0.9 DSM colony rep 2	243000	1200000	200000	1150000	0.158274	166000000	670000000	836000000	0.198565	1.31764
JMJ593 0.1 JMJ550 0.9 DSM colony rep 3	243000	1200000	200000	1150000	0.158274	212000000	610000000	822000000	0.257908	1.84828
JMJ593 0.5 JMJ550 0.5 DSM colony rep 1	1010000	840000	1160000	690000	0.586486	720000000	380000000	1100000000	0.654545	1.33592
JMJ593 0.5 JMJ550 0.5 DSM colony rep 2	1010000	840000	1160000	690000	0.586486	590000000	390000000	980000000	0.602041	1.06664
JMJ593 0.5 JMJ550 0.5 DSM colony rep 3	1010000	840000	1160000	690000	0.586486	496000000	242000000	738000000	0.672087	1.4451
JMJ593 0.9 JMJ550 0.1 DSM colony rep 1	2080000	128000	2010000	139000	0.938674	690000000	37000000	727000000	0.949106	1.21837
JMJ593 0.9 JMJ550 0.1 DSM colony rep 2	2080000	128000	2010000	139000	0.938674	710000000	34000000	744000000	0.954301	1.3643
JMJ593 0.9 JMJ550 0.1 DSM colony rep 3	2080000	128000	2010000	139000	0.938674	720000000	55000000	775000000	0.929032	0.855265
Summary
ICE+ relative fitness (MSgg biofilms)					ICE+ relative fitness (DSM colonies)
0.01	0.1	0.5	0.9		0.01	0.1	0.5	0.9
5.47292	1.46021	0.832191	1.22786		9.71603	3.20779	1.48144	0.766321
4.56716	1.5738	1.17812	1.37018		17.5503	3.19088	1.44672	0.746062
3.04175	1.27172	0.962649	1.03738		15.7974	3.08895	1.31823	0.909736
2.65303	1.80419	0.544192	0.777956		6.73197	2.18239	1.29625	0.690754
1.85205	1.70274	0.671505	0.628081		14.1425	2.41622	1.6396	1.38233
2.0096	2.07799	0.71665	0.993227		15.8074	1.64677	1.20217	1.13899
1.96516	1.0398	0.477565	0.419303		7.89004	1.2332	1.33592	1.21837
1.37026	0.880548	0.510643	0.53744		18.6236	1.31764	1.06664	1.3643
1.98501	0.771596	0.514913	0.396008		14.4817	1.84828	1.4451	0.855265
log(ICE+ relative fitness) (MSgg biofilms)					log(ICE+ relative fitness) (DSM colonies)
0.01	0.1	0.5	0.9		0.01	0.1	0.5	0.9
0.738219	0.164415	-0.0797771	0.089149		0.987489	0.506205	0.170685	-0.11559
0.659646	0.19695	0.07119	0.136778		1.24429	0.503911	0.160385	-0.127225
0.483124	0.104392	-0.016532	0.0159359		1.19859	0.489811	0.119992	-0.0410848
0.423741	0.256281	-0.264248	-0.109045		0.828142	0.338933	0.112689	-0.160677
0.267653	0.231148	-0.17295	-0.201984		1.15053	0.383136	0.214738	0.140612
0.30311	0.317643	-0.144693	-0.00295131		1.19886	0.216633	0.0799649	0.0565211
0.293397	0.0169495	-0.320967	-0.377472		0.897079	0.0910332	0.125781	0.0857782
0.136804	-0.055247	-0.291882	-0.26967		1.27006	0.119796	0.0280191	0.13491
0.297762	-0.11261	-0.288266	-0.402296		1.16082	0.266768	0.159898	-0.0678994
T-Test (two-tailed, unequal variance)					T-Test (two-tailed, unequal variance)
	P-value					P-value
0.01 vs. 0.9	3.70214e-05				0.01 vs. 0.9	4.94434e-11
0.1 vs. 0.9	0.00878752				0.1 vs. 0.9	0.000158131
0.5 vs. 0.9	0.602381				0.5 vs. 0.9	0.00713969
log(Total CFU/ml)					log(Total CFU/ml)
0.01	0.1	0.5	0.9		0.01	0.1	0.5	0.9
9.25285	9.29973	9.26007	9.25983		8.95856	8.98137	8.95904	8.88252
9.34084	9.2052	9.22011	9.27508		8.95856	8.89432	8.91381	8.87737
9.23502	9.2737	9.22789	9.31345		8.90309	8.97128	8.85431	8.89376
9.19368	9.19368	9.34439	9.19866		8.85612	8.85126	8.95904	8.94547
9.30276	9.2033	9.25527	9.15229		8.88649	8.86034	8.88195	8.93551
9.24452	9.16167	9.22272	9.25768		8.88081	8.9489	8.88649	8.89542
9.24329	9.25816	9.39445	9.25042		8.81224	8.92942	9.04139	8.86153
9.30125	9.20222	9.30103	9.25527		8.96802	8.92221	8.99123	8.87157
9.30963	9.27921	9.31175	9.27875		8.85431	8.91487	8.86806	8.8893
T-Test (two-tailed, unequal variance)					T-Test (two-tailed, unequal variance)
	P-value					P-value
0.01 vs. 0.9	0.372779				0.01 vs. 0.9	0.890978
0.1 vs. 0.9	0.424941				0.1 vs. 0.9	0.187872
0.5 vs. 0.9	0.217434				0.5 vs. 0.9	0.171858
