# Supplementary material for: A mobile genetic element increases bacterial host fitness by manipulating development
Source: eLife. 2021 Mar 3;10:e65924. doi: 10.7554/eLife.65924 (PMC8032392; doi:10.7554/eLife.65924)
Supplement: Figure 2—source data 2. — Counts of ICEBs1-containing and ICEBs1-cured cells at start and end of competitions for strains of wild-type or sporulation-deficient backgrounds. [file elife-65924-fig2-data2.xlsx]

## Sheet: Figure 2E-F
Figure 2E (spo0A∆Ps, biofilms)
Replicate 1 (2020.03.13)
	Initial ICE+ CFU/ml (plating rep 1)	Initial ICE0 CFU/ml (plating rep 1)	Initial ICE+ CFU/ml (plating rep 2)	Initial ICE0 CFU/ml (plating rep 2)	Avg. Initial ICE+ frequency	Final ICE+ CFU/ml	Final ICE0 CFU/ml	Total CFU/ml	Final ICE+ frequency	ICE+ Relative fitness
JMJ593 0.01 JMJ550 0.99 MSgg biofilm rep 1	32000	3460000	33900	3480000	0.0094056	19000000	740000000	759000000	0.0250329	2.70415
JMJ593 0.01 JMJ550 0.99 MSgg biofilm rep 2	32000	3460000	33900	3480000	0.0094056	19100000	640000000	659100000	0.0289789	3.14313
JMJ593 0.01 JMJ550 0.99 MSgg biofilm rep 3	32000	3460000	33900	3480000	0.0094056	20200000	650000000	670200000	0.0301403	3.27301
JMJ788 0.01 JMJ786 0.99 MSgg biofilm rep 1	31500	2890000	35400	3100000	0.0110363	20500000	282000000	302500000	0.0677686	6.51422
JMJ788 0.01 JMJ786 0.99 MSgg biofilm rep 2	31500	2890000	35400	3100000	0.0110363	15100000	243000000	258100000	0.0585045	5.56837
JMJ788 0.01 JMJ786 0.99 MSgg biofilm rep 3	31500	2890000	35400	3100000	0.0110363	14100000	214000000	228100000	0.061815	5.90423
Replicate 2 (2020.03.14)
	Initial ICE+ CFU/ml (plating rep 1)	Initial ICE0 CFU/ml (plating rep 1)	Initial ICE+ CFU/ml (plating rep 2)	Initial ICE0 CFU/ml (plating rep 2)	Avg. Initial ICE+ frequency	Final ICE+ CFU/ml	Final ICE0 CFU/ml	Total CFU/ml	Final ICE+ frequency	ICE+ Relative fitness
JMJ593 0.01 JMJ550 0.99 MSgg biofilm rep 1	32300	3450000	29400	3250000	0.00912027	28700000	790000000	818700000	0.0350556	3.94701
JMJ593 0.01 JMJ550 0.99 MSgg biofilm rep 2	32300	3450000	29400	3250000	0.00912027	19400000	700000000	719400000	0.0269669	3.01104
JMJ593 0.01 JMJ550 0.99 MSgg biofilm rep 3	32300	3450000	29400	3250000	0.00912027	24300000	820000000	844300000	0.0287812	3.21963
JMJ788 0.01 JMJ786 0.99 MSgg biofilm rep 1	28100	3770000	28100	3510000	0.00767028	9200000	166000000	175200000	0.0525114	7.17009
JMJ788 0.01 JMJ786 0.99 MSgg biofilm rep 2	28100	3770000	28100	3510000	0.00767028	8200000	180000000	188200000	0.0435707	5.89368
JMJ788 0.01 JMJ786 0.99 MSgg biofilm rep 3	28100	3770000	28100	3510000	0.00767028	10000000	199000000	209000000	0.0478469	6.50118
Replicate 3 (2020.03.15)
	Initial ICE+ CFU/ml (plating rep 1)	Initial ICE0 CFU/ml (plating rep 1)	Initial ICE+ CFU/ml (plating rep 2)	Initial ICE0 CFU/ml (plating rep 2)	Avg. Initial ICE+ frequency	Final ICE+ CFU/ml	Final ICE0 CFU/ml	Total CFU/ml	Final ICE+ frequency	ICE+ Relative fitness
JMJ593 0.01 JMJ550 0.99 MSgg biofilm rep 1	24800	3090000	26200	2940000	0.00839742	20700000	750000000	770700000	0.0268587	3.25912
JMJ593 0.01 JMJ550 0.99 MSgg biofilm rep 2	24800	3090000	26200	2940000	0.00839742	18600000	680000000	698600000	0.0266247	3.22995
JMJ593 0.01 JMJ550 0.99 MSgg biofilm rep 3	24800	3090000	26200	2940000	0.00839742	22000000	1610000000	1632000000	0.0134804	1.61357
JMJ788 0.01 JMJ786 0.99 MSgg biofilm rep 1	22400	2970000	20500	2780000	0.00740288	6700000	166000000	172700000	0.0387956	5.41177
JMJ788 0.01 JMJ786 0.99 MSgg biofilm rep 2	22400	2970000	20500	2780000	0.00740288	13900000	241000000	254900000	0.0545312	7.7334
JMJ788 0.01 JMJ786 0.99 MSgg biofilm rep 3	22400	2970000	20500	2780000	0.00740288	7300000	226000000	233300000	0.0312902	4.33099
Figure 2F (spo0A∆Ps, DSM)
Replicate 1 (2020.03.13)
	Initial ICE+ CFU/ml (plating rep 1)	Initial ICE0 CFU/ml (plating rep 1)	Initial ICE+ CFU/ml (plating rep 2)	Initial ICE0 CFU/ml (plating rep 2)	Avg. Initial ICE+ frequency	Final ICE+ CFU/ml	Final ICE0 CFU/ml	Total CFU/ml	Final ICE+ frequency	ICE+ Relative fitness
JMJ593 0.01 JMJ550 0.99 DSM colony rep 1	32000	3460000	33900	3480000	0.0094056	60400000	458000000	518400000	0.116512	13.8893
JMJ593 0.01 JMJ550 0.99 DSM colony rep 2	32000	3460000	33900	3480000	0.0094056	49500000	355000000	404500000	0.122373	14.6854
JMJ593 0.01 JMJ550 0.99 DSM colony rep 3	32000	3460000	33900	3480000	0.0094056	42400000	395000000	437400000	0.0969364	11.3052
JMJ788 0.01 JMJ786 0.99 DSM colony rep 1	31500	2890000	35400	3100000	0.0110363	2090000	203000000	205090000	0.0101906	0.922588
JMJ788 0.01 JMJ786 0.99 DSM colony rep 2	31500	2890000	35400	3100000	0.0110363	1150000	100000000	101150000	0.0113693	1.03052
JMJ788 0.01 JMJ786 0.99 DSM colony rep 3	31500	2890000	35400	3100000	0.0110363	2770000	185000000	187770000	0.0147521	1.34173
Replicate 2 (2020.03.14)
	Initial ICE+ CFU/ml (plating rep 1)	Initial ICE0 CFU/ml (plating rep 1)	Initial ICE+ CFU/ml (plating rep 2)	Initial ICE0 CFU/ml (plating rep 2)	Avg. Initial ICE+ frequency	Final ICE+ CFU/ml	Final ICE0 CFU/ml	Total CFU/ml	Final ICE+ frequency	ICE+ Relative fitness
JMJ593 0.01 JMJ550 0.99 DSM colony rep 1	32300	3450000	29400	3250000	0.00912027	31000000	370000000	401000000	0.0773067	9.10277
JMJ593 0.01 JMJ550 0.99 DSM colony rep 2	32300	3450000	29400	3250000	0.00912027	36000000	470000000	506000000	0.0711462	8.32181
JMJ593 0.01 JMJ550 0.99 DSM colony rep 3	32300	3450000	29400	3250000	0.00912027	19800000	380000000	399800000	0.0495248	5.66102
JMJ788 0.01 JMJ786 0.99 DSM colony rep 1	28100	3770000	28100	3510000	0.00767028	1580000	185000000	186580000	0.00846822	1.10492
JMJ788 0.01 JMJ786 0.99 DSM colony rep 2	28100	3770000	28100	3510000	0.00767028	3630000	199000000	202630000	0.0179144	2.35993
JMJ788 0.01 JMJ786 0.99 DSM colony rep 3	28100	3770000	28100	3510000	0.00767028	2030000	128000000	130030000	0.0156118	2.05178
Replicate 3 (2020.03.15)
	Initial ICE+ CFU/ml (plating rep 1)	Initial ICE0 CFU/ml (plating rep 1)	Initial ICE+ CFU/ml (plating rep 2)	Initial ICE0 CFU/ml (plating rep 2)	Avg. Initial ICE+ frequency	Final ICE+ CFU/ml	Final ICE0 CFU/ml	Total CFU/ml	Final ICE+ frequency	ICE+ Relative fitness
JMJ593 0.01 JMJ550 0.99 DSM colony rep 1	24800	3090000	26200	2940000	0.00839742	9800000	540000000	549800000	0.0178247	2.14301
JMJ593 0.01 JMJ550 0.99 DSM colony rep 2	24800	3090000	26200	2940000	0.00839742	36000000	440000000	476000000	0.0756303	9.66144
JMJ593 0.01 JMJ550 0.99 DSM colony rep 3	24800	3090000	26200	2940000	0.00839742	10300000	333000000	343300000	0.0300029	3.65245
JMJ788 0.01 JMJ786 0.99 DSM colony rep 1	22400	2970000	20500	2780000	0.00740288	2220000	157000000	159220000	0.013943	1.89595
JMJ788 0.01 JMJ786 0.99 DSM colony rep 2	22400	2970000	20500	2780000	0.00740288	1930000	171000000	172930000	0.0111606	1.51333
JMJ788 0.01 JMJ786 0.99 DSM colony rep 3	22400	2970000	20500	2780000	0.00740288	2780000	155000000	157780000	0.0176195	2.40484
ICE+ relative fitness
	MSgg (biofilms)		DSM (colony sporulation)
	median	standard deviation	median	standard deviation
WT background	3.21963	0.627704	9.10277	4.30808
spo0A∆Ps background	5.90423	1.00687	1.51333	0.571599
	log(ICE+ relative fitness)
	WT (biofilm)	∆Ps (biofilm)	WT (DSM)	∆Ps (DSM)
	0.432031	0.813862	1.14268	-0.0349921
	0.497363	0.745728	1.16689	0.0130555
	0.514947	0.771163	1.05328	0.127666
	0.596268	0.855525	0.959173	0.0433304
	0.478717	0.770386	0.920218	0.372899
	0.507806	0.812992	0.752895	0.312131
	0.513101	0.733339	0.331024	0.277826
	0.509196	0.88837	0.985042	0.179934
	0.207789	0.636587	0.562585	0.381086
T-Test (two-tailed, unequal variance)
	P-value
WT vs. ∆Ps (biofilms)	5.52184e-06
WT vs. ∆Ps (DSM)	2.38591e-05
