# Supplementary material for: A mobile genetic element increases bacterial host fitness by manipulating development
Source: eLife. 2021 Mar 3;10:e65924. doi: 10.7554/eLife.65924 (PMC8032392; doi:10.7554/eLife.65924)
Supplement: Figure 3—source data 1. — Raw counts and calculated frequencies of spore-derived CFUs and total CFUs measured at different times during competition of ICEBs1-containing and ICEBs1-cured cells. [file elife-65924-fig3-data1.xlsx]

## Sheet: Figure 3
2020.01.14
JMJ593 0.01 JMJ550 0.99 MSgg (Fig. 3A)
	Hours post-inoculation	ICE+ total CFU/ml (biofilm rep 1)	ICE0 total CFU/ml (biofilm rep 1)	ICE+ total CFU/ml (biofilm rep 2)	ICE0 total CFU/ml (biofilm rep 2)	ICE+ spore CFU/ml (biofilm rep 1)	ICE0 spore CFU/ml (biofilm rep 1)	ICE+ spore CFU/ml (biofilm rep 2)	ICE0 spore CFU/ml (biofilm rep 2)	Avg. % spores (ICE+)	standard deviation	Avg. % spores (ICE0)	standard deviation	Avg. ICE+ frequency	standard deviation
	0	28500	3110000	30700	3370000	0	0	0	0	0	0	0	0	0.00905416	3.76308e-05
	16	316000	51800000	360000	43200000	0	0	0	0	0	0	0	0	0.00716393	0.00155639
	23	2440000	142000000	2500000	184000000	197000	31700000	236000	36600000	8.75689	0.96607	21.1076	1.72014	0.0151488	0.00246639
	40	23500000	390000000	7800000	296000000	5500000	262000000	3270000	237000000	32.6637	13.0948	73.6235	9.11325	0.0412534	0.0220314
	47	9900000	403000000	9000000	412000000	6600000	348000000	6100000	303000000	67.2222	0.785674	79.948	9.0571	0.0226772	0.00183783
	64	21500000	940000000	27200000	820000000	17100000	640000000	18900000	730000000	74.5101	7.10613	78.5547	14.8063	0.0272333	0.00689066
	71	25000000	840000000	27000000	1040000000	27000000	730000000	27000000	600000000	104	5.65685	72.2985	20.6563	0.0271032	0.00254356
JMJ593 0.9 JMJ550 0.1 MSgg (Fig. 3B)
	Hours post-inoculation	ICE+ total CFU/ml (biofilm rep 1)	ICE0 total CFU/ml (biofilm rep 1)	ICE+ total CFU/ml (biofilm rep 2)	ICE0 total CFU/ml (biofilm rep 2)	ICE+ spore CFU/ml (biofilm rep 1)	ICE0 spore CFU/ml (biofilm rep 1)	ICE+ spore CFU/ml (biofilm rep 2)	ICE0 spore CFU/ml (biofilm rep 2)	Avg. % spores (ICE+)	standard deviation	Avg. % spores (ICE0)	standard deviation	Avg. ICE+ frequency	standard deviation
	0	2670000	249000	2310000	282000	0	0	0	0	0	0	0	0	0.90295	0.0166121
	16	30400000	5110000	23100000	4280000	0	1000	0	0	0	0	0.00978474	0.0138377	0.849889	0.00877898
	23	119000000	21100000	110000000	21400000	17000000	3000000	24600000	3160000	18.3247	5.71195	14.4922	0.387739	0.843266	0.00866544
	40	279000000	59500000	250000000	49500000	199000000	33300000	180000000	32300000	71.6631	0.476473	60.6095	6.56629	0.829475	0.00742464
	47	376000000	73500000	317000000	68700000	327000000	56600000	220000000	56900000	78.1844	12.4221	79.9153	4.11329	0.829184	0.0103257
	64	636000000	146000000	676000000	175000000	519000000	118000000	533000000	150000000	80.225	1.94993	83.2681	3.45943	0.803829	0.0133924
	71	820000000	149000000	720000000	158000000	480000000	132000000	570000000	144000000	68.8516	14.5877	89.8649	1.80216	0.833139	0.0185175
JMJ593 0.01 JMJ550 0.99 DSM (Fig. 3C)
	Hours post-inoculation	ICE+ total CFU/ml (colony rep 1)	ICE0 total CFU/ml (colony rep 1)	ICE+ total CFU/ml (colony rep 2)	ICE0 total CFU/ml (colony rep 2)	ICE+ spore CFU/ml (colony rep 1)	ICE0 spore CFU/ml (colony rep 1)	ICE+ spore CFU/ml (colony rep 2)	ICE0 spore CFU/ml (colony rep 2)	Avg. % spores (ICE+)	standard deviation	Avg. % spores (ICE0)	standard deviation	Avg. ICE+ frequency	standard deviation
	0	28500	3110000	30700	3370000	0	0	0	0	0	0	0	0	0.00905416	3.76308e-05
	16	640000	81000000	630000	75000000	182000	35900000	242000	41000000	33.4251	7.05353	49.4938	7.3155	0.00808466	0.000347001
	23	1910000	122000000	1900000	149000000	540000	73500000	546000	72100000	28.5045	0.328515	54.3176	8.38391	0.0140028	0.00199637
	40	14200000	255000000	13700000	276000000	5980000	199000000	6790000	215000000	45.8374	5.2675	77.9689	0.0994651	0.0500196	0.0038598
	47	20500000	338000000	30300000	407000000	13600000	328000000	16600000	335000000	60.5635	8.17132	89.6755	10.417	0.0632358	0.00856031
	64	28000000	410000000	56700000	520000000	25700000	404000000	50200000	450000000	90.1609	2.29779	92.5375	8.48395	0.0811225	0.0243182
	71	44000000	420000000	97000000	460000000	38000000	500000000	44000000	470000000	65.8622	28.9934	110.611	11.9315	0.134487	0.0560874
JMJ593 0.9 JMJ550 0.1 DSM (Fig. 3D)
	Hours post-inoculation	ICE+ total CFU/ml (colony rep 1)	ICE0 total CFU/ml (colony rep 1)	ICE+ total CFU/ml (colony rep 2)	ICE0 total CFU/ml (colony rep 2)	ICE+ spore CFU/ml (colony rep 1)	ICE0 spore CFU/ml (colony rep 1)	ICE+ spore CFU/ml (colony rep 2)	ICE0 spore CFU/ml (colony rep 2)	Avg. % spores (ICE+)	standard deviation	Avg. % spores (ICE0)	standard deviation	Avg. ICE+ frequency	standard deviation
	0	2670000	249000	2310000	282000	0	0	0	0	0	0	0	0	0.90295	0.0166121
	16	72000000	9900000	114000000	17000000	20400000	5200000	39000000	7300000	31.2719	4.1558	47.7332	6.77697	0.874675	0.0062875
	23	125000000	17000000	138000000	15700000	58800000	9430000	59000000	9970000	44.8968	3.03093	59.4869	5.6799	0.889067	0.0124248
	40	219000000	26300000	242000000	29600000	166000000	22600000	161000000	23300000	71.164	6.55499	82.3239	5.10202	0.8919	0.00125027
	47	267000000	29000000	336000000	33900000	235000000	26500000	263000000	30500000	83.1444	6.88805	90.6749	0.996178	0.90519	0.00447357
	64	560000000	45000000	480000000	46400000	490000000	38500000	360000000	35000000	81.25	8.83883	80.4933	7.15912	0.918737	0.00973384
	71	520000000	37000000	460000000	49000000	290000000	42000000	480000000	36000000	80.0585	34.3503	93.4915	28.3155	0.918653	0.0211
