# Supplementary material for: A mobile genetic element increases bacterial host fitness by manipulating development
Source: eLife. 2021 Mar 3;10:e65924. doi: 10.7554/eLife.65924 (PMC8032392; doi:10.7554/eLife.65924)
Supplement: Figure 4—source data 1. — Counts of ICEBs1-containing (wild-type or rapI-phrI mutant) and ICEBs1-cured cells at start and end of competitions. Counts of cells containing ectopically expressed rapI-phrI and wild-type cells at start and end of competitions. [file elife-65924-fig4-data1.xlsx]

## Sheet: Figure 4
Figure 4A
Replicate 1 2019.08.23
	Initial ICE+ CFU/ml (plating rep 1)	Initial ICE0 CFU/ml (plating rep 1)	Initial ICE+ CFU/ml (plating rep 2)	Initial ICE0 CFU/ml (plating rep 2)	Avg. Initial ICE+ frequency	Final ICE+ CFU/ml	Final ICE0 CFU/ml	Total CFU/ml	Final ICE+ frequency	ICE+ Relative fitness
JMJ646 0.01 JMJ550 0.99 MSgg biofilm rep 1	27200	2730000	30800	2510000	0.0109936	300000000	1710000000	2010000000	0.149254	15.7828
JMJ646 0.01 JMJ550 0.99 MSgg biofilm rep 2	27200	2730000	30800	2510000	0.0109936	210000000	1240000000	1450000000	0.144828	15.2355
JMJ646 0.01 JMJ550 0.99 MSgg biofilm rep 3	27200	2730000	30800	2510000	0.0109936	175000000	1110000000	1285000000	0.136187	14.1832
JMJ686 0.01 JMJ550 0.99 MSgg biofilm rep 1	28200	2660000	23900	2370000	0.010237	13300000	1390000000	1403300000	0.00947766	0.925114
JMJ686 0.01 JMJ550 0.99 MSgg biofilm rep 2	28200	2660000	23900	2370000	0.010237	8000000	1540000000	1548000000	0.00516796	0.502259
JMJ686 0.01 JMJ550 0.99 MSgg biofilm rep 3	28200	2660000	23900	2370000	0.010237	13100000	1700000000	1713100000	0.00764696	0.745042
Replicate 2 2019.09.05
	Initial ICE+ CFU/ml (plating rep 1)	Initial ICE0 CFU/ml (plating rep 1)	Initial ICE+ CFU/ml (plating rep 2)	Initial ICE0 CFU/ml (plating rep 2)	Avg. Initial ICE+ frequency	Final ICE+ CFU/ml	Final ICE0 CFU/ml	Total CFU/ml	Final ICE+ frequency	ICE+ Relative fitness
JMJ646 0.01 JMJ550 0.99 MSgg biofilm rep 1	34000	3000000	35500	3060000	0.0113373	141000000	1290000000	1431000000	0.0985325	9.53165
JMJ646 0.01 JMJ550 0.99 MSgg biofilm rep 2	34000	3000000	35500	3060000	0.0113373	155000000	980000000	1135000000	0.136564	13.7925
JMJ646 0.01 JMJ550 0.99 MSgg biofilm rep 3	34000	3000000	35500	3060000	0.0113373	229000000	1410000000	1639000000	0.139719	14.163
JMJ686 0.01 JMJ550 0.99 MSgg biofilm rep 1	32600	3160000	32600	2810000	0.0108397	9900000	1330000000	1339900000	0.00738861	0.679252
JMJ686 0.01 JMJ550 0.99 MSgg biofilm rep 2	32600	3160000	32600	2810000	0.0108397	8400000	1360000000	1368400000	0.00613856	0.563622
JMJ686 0.01 JMJ550 0.99 MSgg biofilm rep 3	32600	3160000	32600	2810000	0.0108397	12000000	1480000000	1492000000	0.0080429	0.73989
Replicate 3 2019.09.13
	Initial ICE+ CFU/ml (plating rep 1)	Initial ICE0 CFU/ml (plating rep 1)	Initial ICE+ CFU/ml (plating rep 2)	Initial ICE0 CFU/ml (plating rep 2)	Avg. Initial ICE+ frequency	Final ICE+ CFU/ml	Final ICE0 CFU/ml	Total CFU/ml	Final ICE+ frequency	ICE+ Relative fitness
JMJ646 0.01 JMJ550 0.99 MSgg biofilm rep 1	41500	2880000	40700	2470000	0.0152078	242000000	1390000000	1632000000	0.148284	11.274
JMJ646 0.01 JMJ550 0.99 MSgg biofilm rep 2	41500	2880000	40700	2470000	0.0152078	240000000	1270000000	1510000000	0.15894	12.2373
JMJ646 0.01 JMJ550 0.99 MSgg biofilm rep 3	41500	2880000	40700	2470000	0.0152078	229000000	1660000000	1889000000	0.121228	8.93316
JMJ686 0.01 JMJ550 0.99 MSgg biofilm rep 1	35000	2340000	36200	2480000	0.0145618	11700000	2090000000	2101700000	0.00556692	0.378838
JMJ686 0.01 JMJ550 0.99 MSgg biofilm rep 2	35000	2340000	36200	2480000	0.0145618	9500000	1570000000	1579500000	0.00601456	0.409485
JMJ686 0.01 JMJ550 0.99 MSgg biofilm rep 3	35000	2340000	36200	2480000	0.0145618	11900000	2010000000	2021900000	0.00588555	0.40065
Figure 4B
Replicate 1 2020.02.20
	Initial ICE+ CFU/ml (plating rep 1)	Initial ICE0 CFU/ml (plating rep 1)	Initial ICE+ CFU/ml (plating rep 2)	Initial ICE0 CFU/ml (plating rep 2)	Avg. Initial ICE+ frequency	Final ICE+ CFU/ml	Final ICE0 CFU/ml	Total CFU/ml	Final ICE+ frequency	ICE+ Relative fitness
JMJ576 0.01 JMJ714 0.99 MSgg biofilm rep 1	12200	1270000	10400	1550000	0.00808993	5100000	1190000000	1195100000	0.00426743	0.525474
JMJ576 0.01 JMJ714 0.99 MSgg biofilm rep 2	12200	1270000	10400	1550000	0.00808993	7300000	1280000000	1287300000	0.00567078	0.699263
JMJ576 0.01 JMJ714 0.99 MSgg biofilm rep 3	12200	1270000	10400	1550000	0.00808993	10700000	1230000000	1240700000	0.00862416	1.06661
JMJ785 0.01 JMJ714 0.99 MSgg biofilm rep 1	16000	1600000	14800	1390000	0.0102181	90000000	990000000	1080000000	0.0833333	8.80592
JMJ785 0.01 JMJ714 0.99 MSgg biofilm rep 2	16000	1600000	14800	1390000	0.0102181	151000000	1150000000	1301000000	0.116065	12.7188
JMJ785 0.01 JMJ714 0.99 MSgg biofilm rep 3	16000	1600000	14800	1390000	0.0102181	111000000	1200000000	1311000000	0.0846682	8.96002
JMJ576 0.01 JMJ714 0.99 DSM colony rep 1	12200	1270000	10400	1550000	0.00808993	6300000	790000000	796300000	0.00791159	0.97778
JMJ576 0.01 JMJ714 0.99 DSM colony rep 2	12200	1270000	10400	1550000	0.00808993	7200000	600000000	607200000	0.0118577	1.47133
JMJ576 0.01 JMJ714 0.99 DSM colony rep 3	12200	1270000	10400	1550000	0.00808993	4900000	800000000	804900000	0.00608771	0.750989
JMJ785 0.01 JMJ714 0.99 DSM colony rep 1	16000	1600000	14800	1390000	0.0102181	63000000	540000000	603000000	0.104478	11.3009
JMJ785 0.01 JMJ714 0.99 DSM colony rep 2	16000	1600000	14800	1390000	0.0102181	79000000	840000000	919000000	0.085963	9.10993
JMJ785 0.01 JMJ714 0.99 DSM colony rep 3	16000	1600000	14800	1390000	0.0102181	77000000	900000000	977000000	0.0788127	8.28735
Replicate 2 2020.02.21
	Initial ICE+ CFU/ml (plating rep 1)	Initial ICE0 CFU/ml (plating rep 1)	Initial ICE+ CFU/ml (plating rep 2)	Initial ICE0 CFU/ml (plating rep 2)	Avg. Initial ICE+ frequency	Final ICE+ CFU/ml	Final ICE0 CFU/ml	Total CFU/ml	Final ICE+ frequency	ICE+ Relative fitness
JMJ576 0.01 JMJ714 0.99 MSgg biofilm rep 1	14700	2010000	14400	2180000	0.00691125	2700000	1420000000	1422700000	0.0018978	0.273217
JMJ576 0.01 JMJ714 0.99 MSgg biofilm rep 2	14700	2010000	14400	2180000	0.00691125	2700000	1100000000	1102700000	0.00244854	0.352698
JMJ576 0.01 JMJ714 0.99 MSgg biofilm rep 3	14700	2010000	14400	2180000	0.00691125	1800000	1120000000	1121800000	0.00160456	0.230933
JMJ785 0.01 JMJ714 0.99 MSgg biofilm rep 1	16900	2250000	17200	2170000	0.00765953	91000000	1410000000	1501000000	0.0606262	8.36144
JMJ785 0.01 JMJ714 0.99 MSgg biofilm rep 2	16900	2250000	17200	2170000	0.00765953	96000000	1110000000	1206000000	0.079602	11.2049
JMJ785 0.01 JMJ714 0.99 MSgg biofilm rep 3	16900	2250000	17200	2170000	0.00765953	100000000	1030000000	1130000000	0.0884956	12.5783
JMJ576 0.01 JMJ714 0.99 DSM colony rep 1	14700	2010000	14400	2180000	0.00691125	3500000	580000000	583500000	0.00599829	0.867105
JMJ576 0.01 JMJ714 0.99 DSM colony rep 2	14700	2010000	14400	2180000	0.00691125	3100000	600000000	603100000	0.00514011	0.742407
JMJ576 0.01 JMJ714 0.99 DSM colony rep 3	14700	2010000	14400	2180000	0.00691125	4800000	560000000	564800000	0.00849858	1.23164
JMJ785 0.01 JMJ714 0.99 DSM colony rep 1	16900	2250000	17200	2170000	0.00765953	53000000	500000000	553000000	0.0958409	13.733
JMJ785 0.01 JMJ714 0.99 DSM colony rep 2	16900	2250000	17200	2170000	0.00765953	79000000	730000000	809000000	0.0976514	14.0205
JMJ785 0.01 JMJ714 0.99 DSM colony rep 3	16900	2250000	17200	2170000	0.00765953	84000000	640000000	724000000	0.116022	17.0043
Replicate 3 2020.02.24
	Initial ICE+ CFU/ml (plating rep 1)	Initial ICE0 CFU/ml (plating rep 1)	Initial ICE+ CFU/ml (plating rep 2)	Initial ICE0 CFU/ml (plating rep 2)	Avg. Initial ICE+ frequency	Final ICE+ CFU/ml	Final ICE0 CFU/ml	Total CFU/ml	Final ICE+ frequency	ICE+ Relative fitness
JMJ576 0.01 JMJ714 0.99 MSgg biofilm rep 1	13200	1670000	12800	1690000	0.00767962	3500000	1080000000	1083500000	0.00323027	0.418752
JMJ576 0.01 JMJ714 0.99 MSgg biofilm rep 2	13200	1670000	12800	1690000	0.00767962	2530000	1130000000	1132530000	0.00223394	0.289304
JMJ576 0.01 JMJ714 0.99 MSgg biofilm rep 3	13200	1670000	12800	1690000	0.00767962	7000000	1060000000	1067000000	0.00656045	0.853305
JMJ785 0.01 JMJ714 0.99 MSgg biofilm rep 1	11600	2110000	12400	1670000	0.006419	90000000	1240000000	1330000000	0.0676692	11.2346
JMJ785 0.01 JMJ714 0.99 MSgg biofilm rep 2	11600	2110000	12400	1670000	0.006419	101000000	1200000000	1301000000	0.0776326	13.028
JMJ785 0.01 JMJ714 0.99 MSgg biofilm rep 3	11600	2110000	12400	1670000	0.006419	88000000	1240000000	1328000000	0.0662651	10.9849
JMJ576 0.01 JMJ714 0.99 DSM colony rep 1	13200	1670000	12800	1690000	0.00767962	3000000	740000000	743000000	0.00403769	0.523844
JMJ576 0.01 JMJ714 0.99 DSM colony rep 2	13200	1670000	12800	1690000	0.00767962	4100000	610000000	614100000	0.00667644	0.868493
JMJ576 0.01 JMJ714 0.99 DSM colony rep 3	13200	1670000	12800	1690000	0.00767962	3130000	710000000	713130000	0.0043891	0.569637
JMJ785 0.01 JMJ714 0.99 DSM colony rep 1	11600	2110000	12400	1670000	0.006419	42000000	570000000	612000000	0.0686275	11.4054
JMJ785 0.01 JMJ714 0.99 DSM colony rep 2	11600	2110000	12400	1670000	0.006419	50000000	400000000	450000000	0.111111	19.3484
JMJ785 0.01 JMJ714 0.99 DSM colony rep 3	11600	2110000	12400	1670000	0.006419	47000000	760000000	807000000	0.0582404	9.57239
Summary
Figure 4A			Figure 4B
log(JMJ646 relative fitness)	log(JMJ686 relative fitness)		log(JMJ576 relative fitness) (MSgg)	log(JMJ785 relative fitness) (MSgg)	log(JMJ576 relative fitness) (DSM)	log(JMJ785 relative fitness) (DSM)
1.19818	-0.0338046		-0.279449	0.944775	-0.00975884	1.05311
1.18286	-0.299072		-0.155359	1.10445	0.167709	0.959515
1.15177	-0.127819		0.0280064	0.952309	-0.124366	0.918415
0.979168	-0.167969		-0.563493	0.922281	-0.0619283	1.13776
1.13964	-0.249012		-0.452597	1.04941	-0.129358	1.14676
1.15116	-0.130833		-0.636514	1.09962	0.0904849	1.23056
1.05208	-0.421546		-0.378043	1.05056	-0.280798	11.4054
1.08769	-0.387762		-0.538646	1.11488	-0.0612337	19.3484
0.951005	-0.397235		-0.0688955	1.0408	-0.244402	9.57239
T-Test (two-tailed, unequal variance)			T-Test (two-tailed, unequal variance)
	P-value			P-value
JMJ646 vs. JMJ686	1.29767e-12		JMJ576 vs. JMJ785 (MSgg)	2.07886e-08
			JMJ576 vs. JMJ785 (DSM)	0.0462128
