# Supplementary material for: A mobile genetic element increases bacterial host fitness by manipulating development
Source: eLife. 2021 Mar 3;10:e65924. doi: 10.7554/eLife.65924 (PMC8032392; doi:10.7554/eLife.65924)
Supplement: Figure 5—source data 1. — Counts of ICEBs1-containing (wild-type or deletion mutant) cells and ICEBs1-cured cells at the start and end of competitions. [file elife-65924-fig5-data1.xlsx]

## Sheet: Figure 5
2019.08.01
	Initial ICE+ CFU/ml (plating rep 1)	Initial ICE0 CFU/ml (plating rep 1)	Initial ICE+ CFU/ml (plating rep 2)	Initial ICE0 CFU/ml (plating rep 2)	Avg. Initial ICE+ frequency	Final ICE+ CFU/ml	Final ICE0 CFU/ml	Total CFU/ml	Final ICE+ frequency	ICE+ Relative fitness
JMJ646 0.01 JMJ550 0.99 MSgg biofilm rep 1	34700	2440000	37200	2400000	0.0146427	120000000	1160000000	1280000000	0.09375	6.96141
JMJ646 0.01 JMJ550 0.99 MSgg biofilm rep 2	34700	2440000	37200	2400000	0.0146427	155000000	1080000000	1235000000	0.125506	9.65788
JMJ646 0.01 JMJ550 0.99 MSgg biofilm rep 3	34700	2440000	37200	2400000	0.0146427	196000000	1330000000	1526000000	0.12844	9.91695
JMJ688 0.01 JMJ550 0.99 MSgg biofilm rep 1	38300	2490000	38200	2340000	0.0156055	201000000	1380000000	1581000000	0.127135	9.18771
JMJ688 0.01 JMJ550 0.99 MSgg biofilm rep 2	38300	2490000	38200	2340000	0.0156055	220000000	1490000000	1710000000	0.128655	9.31379
JMJ688 0.01 JMJ550 0.99 MSgg biofilm rep 3	38300	2490000	38200	2340000	0.0156055	229000000	1260000000	1489000000	0.153794	11.4645
2019.08.23
	Initial ICE+ CFU/ml (plating rep 1)	Initial ICE0 CFU/ml (plating rep 1)	Initial ICE+ CFU/ml (plating rep 2)	Initial ICE0 CFU/ml (plating rep 2)	Avg. Initial ICE+ frequency	Final ICE+ CFU/ml	Final ICE0 CFU/ml	Total CFU/ml	Final ICE+ frequency	ICE+ Relative fitness
JMJ646 0.01 JMJ550 0.99 MSgg biofilm rep 1	27200	2730000	30800	2510000	0.0109936	300000000	1710000000	2010000000	0.149254	15.7828
JMJ646 0.01 JMJ550 0.99 MSgg biofilm rep 2	27200	2730000	30800	2510000	0.0109936	210000000	1240000000	1450000000	0.144828	15.2355
JMJ646 0.01 JMJ550 0.99 MSgg biofilm rep 3	27200	2730000	30800	2510000	0.0109936	175000000	1110000000	1285000000	0.136187	14.1832
JMJ662 0.01 JMJ550 0.99 MSgg biofilm rep 1	30100	2430000	23700	2430000	0.0109471	11400000	1550000000	1561400000	0.00730114	0.664499
JMJ662 0.01 JMJ550 0.99 MSgg biofilm rep 2	30100	2430000	23700	2430000	0.0109471	9100000	1470000000	1479100000	0.00615239	0.559301
JMJ662 0.01 JMJ550 0.99 MSgg biofilm rep 3	30100	2430000	23700	2430000	0.0109471	9100000	1790000000	1799100000	0.00505808	0.459314
JMJ703 0.01 JMJ550 0.99 MSgg biofilm rep 1	28900	2700000	28600	2810000	0.0103329	66000000	1630000000	1696000000	0.0389151	3.87815
JMJ703 0.01 JMJ550 0.99 MSgg biofilm rep 2	28900	2700000	28600	2810000	0.0103329	42000000	1450000000	1492000000	0.0281501	2.77428
JMJ703 0.01 JMJ550 0.99 MSgg biofilm rep 3	28900	2700000	28600	2810000	0.0103329	61000000	1660000000	1721000000	0.0354445	3.51957
JMJ704 0.01 JMJ550 0.99 MSgg biofilm rep 1	26900	2650000	30200	2630000	0.0107007	190000000	1560000000	1750000000	0.108571	11.2601
JMJ704 0.01 JMJ550 0.99 MSgg biofilm rep 2	26900	2650000	30200	2630000	0.0107007	166000000	1410000000	1576000000	0.10533	10.8844
JMJ704 0.01 JMJ550 0.99 MSgg biofilm rep 3	26900	2650000	30200	2630000	0.0107007	194000000	1540000000	1734000000	0.11188	11.6465
2019.08.28
	Initial ICE+ CFU/ml (plating rep 1)	Initial ICE0 CFU/ml (plating rep 1)	Initial ICE+ CFU/ml (plating rep 2)	Initial ICE0 CFU/ml (plating rep 2)	Avg. Initial ICE+ frequency	Final ICE+ CFU/ml	Final ICE0 CFU/ml	Total CFU/ml	Final ICE+ frequency	ICE+ Relative fitness
JMJ646 0.01 JMJ550 0.99 MSgg biofilm rep 1	24700	2640000	24200	2810000	0.00890395	223000000	1350000000	1573000000	0.141767	18.3867
JMJ646 0.01 JMJ550 0.99 MSgg biofilm rep 2	24700	2640000	24200	2810000	0.00890395	280000000	1850000000	2130000000	0.131455	16.8469
JMJ646 0.01 JMJ550 0.99 MSgg biofilm rep 3	24700	2640000	24200	2810000	0.00890395	253000000	1690000000	1943000000	0.130211	16.6635
JMJ662 0.01 JMJ550 0.99 MSgg biofilm rep 1	24500	2770000	24000	2250000	0.00966066	19100000	1830000000	1849100000	0.0103293	1.06994
JMJ662 0.01 JMJ550 0.99 MSgg biofilm rep 2	24500	2770000	24000	2250000	0.00966066	8900000	1600000000	1608900000	0.00553173	0.570227
JMJ662 0.01 JMJ550 0.99 MSgg biofilm rep 3	24500	2770000	24000	2250000	0.00966066	11900000	1980000000	1991900000	0.0059742	0.616111
2019.09.05
	Initial ICE+ CFU/ml (plating rep 1)	Initial ICE0 CFU/ml (plating rep 1)	Initial ICE+ CFU/ml (plating rep 2)	Initial ICE0 CFU/ml (plating rep 2)	Avg. Initial ICE+ frequency	Final ICE+ CFU/ml	Final ICE0 CFU/ml	Total CFU/ml	Final ICE+ frequency	ICE+ Relative fitness
JMJ646 0.01 JMJ550 0.99 MSgg biofilm rep 1	34000	3000000	35500	3060000	0.0113373	141000000	1290000000	1431000000	0.0985325	9.53165
JMJ646 0.01 JMJ550 0.99 MSgg biofilm rep 2	34000	3000000	35500	3060000	0.0113373	155000000	980000000	1135000000	0.136564	13.7925
JMJ646 0.01 JMJ550 0.99 MSgg biofilm rep 3	34000	3000000	35500	3060000	0.0113373	229000000	1410000000	1639000000	0.139719	14.163
JMJ662 0.01 JMJ550 0.99 MSgg biofilm rep 1	27300	2810000	27900	3040000	0.009358	9900000	1420000000	1429900000	0.00692356	0.738041
JMJ662 0.01 JMJ550 0.99 MSgg biofilm rep 2	27300	2810000	27900	3040000	0.009358	7400000	1440000000	1447400000	0.00511262	0.544005
JMJ662 0.01 JMJ550 0.99 MSgg biofilm rep 3	27300	2810000	27900	3040000	0.009358	10600000	1420000000	1430600000	0.00740948	0.790226
JMJ703 0.01 JMJ550 0.99 MSgg biofilm rep 1	27800	3060000	28200	3000000	0.00915782	43000000	1210000000	1253000000	0.0343176	3.84499
JMJ703 0.01 JMJ550 0.99 MSgg biofilm rep 2	27800	3060000	28200	3000000	0.00915782	40000000	1130000000	1170000000	0.034188	3.82996
JMJ703 0.01 JMJ550 0.99 MSgg biofilm rep 3	27800	3060000	28200	3000000	0.00915782	61000000	1380000000	1441000000	0.0423317	4.78259
JMJ704 0.01 JMJ550 0.99 MSgg biofilm rep 1	27700	2840000	25700	2720000	0.0095097	172000000	1330000000	1502000000	0.114514	13.4698
JMJ704 0.01 JMJ550 0.99 MSgg biofilm rep 2	27700	2840000	25700	2720000	0.0095097	173000000	1220000000	1393000000	0.124192	14.7696
JMJ704 0.01 JMJ550 0.99 MSgg biofilm rep 3	27700	2840000	25700	2720000	0.0095097	159000000	1330000000	1489000000	0.106783	12.4517
2019.09.13
	Initial ICE+ CFU/ml (plating rep 1)	Initial ICE0 CFU/ml (plating rep 1)	Initial ICE+ CFU/ml (plating rep 2)	Initial ICE0 CFU/ml (plating rep 2)	Avg. Initial ICE+ frequency	Final ICE+ CFU/ml	Final ICE0 CFU/ml	Total CFU/ml	Final ICE+ frequency	ICE+ Relative fitness
JMJ646 0.01 JMJ550 0.99 MSgg biofilm rep 1	41500	2880000	40700	2470000	0.0152078	242000000	1390000000	1632000000	0.148284	11.274
JMJ646 0.01 JMJ550 0.99 MSgg biofilm rep 2	41500	2880000	40700	2470000	0.0152078	240000000	1270000000	1510000000	0.15894	12.2373
JMJ646 0.01 JMJ550 0.99 MSgg biofilm rep 3	41500	2880000	40700	2470000	0.0152078	229000000	1660000000	1889000000	0.121228	8.93316
JMJ703 0.01 JMJ550 0.99 MSgg biofilm rep 1	34700	2650000	36500	2520000	0.0136012	63000000	1540000000	1603000000	0.0393013	2.96684
JMJ703 0.01 JMJ550 0.99 MSgg biofilm rep 2	34700	2650000	36500	2520000	0.0136012	63000000	1690000000	1753000000	0.0359384	2.70351
JMJ703 0.01 JMJ550 0.99 MSgg biofilm rep 3	34700	2650000	36500	2520000	0.0136012	62000000	1470000000	1532000000	0.04047	3.05879
JMJ704 0.01 JMJ550 0.99 MSgg biofilm rep 1	29400	2480000	34900	2370000	0.013114	203000000	1490000000	1693000000	0.119905	10.2528
JMJ704 0.01 JMJ550 0.99 MSgg biofilm rep 2	29400	2480000	34900	2370000	0.013114	224000000	1370000000	1594000000	0.140527	12.3044
JMJ704 0.01 JMJ550 0.99 MSgg biofilm rep 3	29400	2480000	34900	2370000	0.013114	208000000	1800000000	2008000000	0.103586	8.69607
Summary (Figure 5)
	Median relative fitness	standard deviation
A (JMJ646)	13.7925	3.40682
B (JMJ662)	0.616111	0.181799
C (JMJ704)	11.6465	1.78338
D (JMJ703)	3.51957	0.67584
E (JMJ688)	9.31379	1.27966
log(Relative fitness)
JMJ646	JMJ662	JMJ704	JMJ703	JMJ688
0.842697	-0.177506	1.05154	0.588625	0.963207
0.984882	-0.252355	1.0368	0.44315	0.969127
0.996378	-0.33789	1.0662	0.54649	1.05936
1.19818	0.0293597	1.12936	0.584896
1.18286	-0.243953	1.16937	0.583194
1.15177	-0.210341	1.09523	0.679663
1.2645	-0.131919	1.01084	0.472295
1.22652	-0.264397	1.09006	0.431929
1.22177	-0.102249	0.939323	0.485549
0.979168
1.13964
1.15116
1.05208
1.08769
0.951005
T-Test (two-tailed, unequal variance)
	P-value
JMJ662 vs. JMJ646	2.33572e-16
JMJ704 vs. JMJ646	0.44862
JMJ703 vs. JMJ646	6.3178e-12
JMJ688 vs. JMJ646	0.0617409
