# Supplementary material for: A mobile genetic element increases bacterial host fitness by manipulating development
Source: eLife. 2021 Mar 3;10:e65924. doi: 10.7554/eLife.65924 (PMC8032392; doi:10.7554/eLife.65924)
Supplement: Figure 6—source data 1. — Raw counts and calculated frequencies of spore-derived CFUs and total CFUs measured at different times during competition of cells ectopically expressing devI and wild-type cells. [file elife-65924-fig6-data1.xlsx]

## Sheet: Figure 6
2019.10.07
JMJ725 0.01 JMJ727 0.99 MSgg (Fig. 6A)
	Hours post-inoculation	ICE+ total CFU/ml (biofilm rep 1)	ICE0 total CFU/ml (biofilm rep 1)	ICE+ total CFU/ml (biofilm rep 2)	ICE0 total CFU/ml (biofilm rep 2)	ICE+ spore CFU/ml (biofilm rep 1)	ICE0 spore CFU/ml (biofilm rep 1)	ICE+ spore CFU/ml (biofilm rep 2)	ICE0 spore CFU/ml (biofilm rep 2)	Avg. % spores (ICE+)	standard deviation	Avg. % spores (ICE0)	standard deviation	Avg. ICE+ frequency	standard deviation
	0	25300	1620000	24700	1900000	0	0	0	0	0	0	0	0	0.0141052	0.00179886
	22.5	4600000	112000000	3700000	159000000	900	13300000	1400	17300000	0.0287015	0.0129207	11.3778	0.703215	0.0310962	0.0118157
	47	17300000	366000000	20500000	362000000	1250000	288000000	1860000	278000000	8.1493	1.30655	77.7421	1.33851	0.0493646	0.00598241
	71	46000000	790000000	44000000	610000000	10800000	480000000	11200000	500000000	24.4664	1.39744	71.3634	14.9961	0.0611511	0.00866514
JMJ725 0.01 JMJ727 0.99 DSM (Fig. 6B)
	Hours post-inoculation	ICE+ total CFU/ml (biofilm rep 1)	ICE0 total CFU/ml (biofilm rep 1)	ICE+ total CFU/ml (biofilm rep 2)	ICE0 total CFU/ml (biofilm rep 2)	ICE+ spore CFU/ml (biofilm rep 1)	ICE0 spore CFU/ml (biofilm rep 1)	ICE+ spore CFU/ml (biofilm rep 2)	ICE0 spore CFU/ml (biofilm rep 2)	Avg. % spores (ICE+)	standard deviation	Avg. % spores (ICE0)	standard deviation	Avg. ICE+ frequency	standard deviation
	0	25300	1620000	24700	1900000	0	0	0	0	0	0	0	0	0.0141052	0.00179886
	17	1580000	93000000	1560000	95000000	218000	30900000	181000	34700000	12.7	1.55203	34.8761	2.33381	0.0164306	0.00038868
	23.5	2720000	145000000	2670000	117000000	730000	90000000	470000	90000000	22.2206	6.5303	69.496	10.5034	0.0203623	0.0027564
	46.5	6500000	218000000	6200000	220000000	2210000	186000000	1690000	202000000	30.629	4.76727	88.5696	4.59413	0.0281813	0.00109167
	70.5	12600000	322000000	11900000	349000000	5900000	331000000	8400000	315000000	58.7068	16.8029	96.5265	8.8651	0.035315	0.00331193
