# Supplementary material for: A mobile genetic element increases bacterial host fitness by manipulating development
Source: eLife. 2021 Mar 3;10:e65924. doi: 10.7554/eLife.65924 (PMC8032392; doi:10.7554/eLife.65924)
Supplement: Figure 7—source data 1. — Raw data used to calculate beta-gal activity (for early sporulation gene reporters) and mRNA transcript abundance (RT-qPCR for biofilm gene expression). [file elife-65924-fig7-data1.xlsx]

## Sheet: Figure 7
Figure 7A (beta-gals 2019.10.25)
JMJ731 (ydcO+, PspoIIE-lacZ)
Time relative to T0 (hours)	Culture OD600	Volume assayed (ml)	Time assayed (minutes)	A420	Activity (Miller units)
-1	0.6	0.5	176	0	0
0	1.44	0.25	176	0	0
1	1.63	0.1	115	0.066	3.52094
2	1.7	0.05	115	0.186	19.0281
3	2	0.05	57	0.179	31.4035
4	2.17	0.05	57	0.287	46.4063
JMJ734 (ydcO-, PspoIIE-lacZ)
Time relative to T0 (hours)	Culture OD600	Volume assayed (ml)	Time assayed (minutes)	A420	Activity (Miller units)
-1	0.52	0.5	77.5	0.089	4.41687
0	1.48	0.25	77.5	0.317	11.0549
1	1.6	0.1	47.5	0.402	52.8947
2	1.82	0.05	47.5	0.393	90.9196
3	1.93	0.05	57	0.525	95.4459
4	2.03	0.05	57	0.556	96.1023
JMJ732 (ydcO+, PspoIIA-lacZ)
Time relative to T0 (hours)	Culture OD600	Volume assayed (ml)	Time assayed (minutes)	A420	Activity (Miller units)
-1	0.56	0.5	176	0.03	0.608766
0	1.4	0.25	176	0.046	0.746753
1	1.6	0.1	64.5	0.308	29.845
2	1.8	0.05	64	0.361	62.6736
3	2	0.05	57	0.279	48.9474
4	2.07	0.05	57	0.267	45.2581
JMJ735 (ydcO-, PspoIIA-lacZ)
Time relative to T0 (hours)	Culture OD600	Volume assayed (ml)	Time assayed (minutes)	A420	Activity (Miller units)
-1	0.52	0.5	77.5	0.15	7.44417
0	1.52	0.25	77.5	0.28	9.50764
1	1.23	0.1	47.5	0.567	97.0475
2	1.37	0.05	47.5	0.408	125.394
3	1.47	0.05	57	0.414	98.8185
4	1.67	0.05	57	0.494	103.792
JMJ733 (ydcO+, PspoIIG-lacZ)
Time relative to T0 (hours)	Culture OD600	Volume assayed (ml)	Time assayed (minutes)	A420	Activity (Miller units)
-1	0.58	0.5	176	0	0
0	1.48	0.25	176	0	0
1	1.6	0.1	115	0.035	1.90217
2	1.75	0.05	115	0.116	11.528
3	1.97	0.05	57	0.107	19.0578
4	2.1	0.05	57	0.139	23.2247
JMJ736 (ydcO-, PspoIIG-lacZ)
Time relative to T0 (hours)	Culture OD600	Volume assayed (ml)	Time assayed (minutes)	A420	Activity (Miller units)
-1	0.38	0.5	77.5	0.055	3.73514
0	1.54	0.25	77.5	0.301	10.088
1	1.37	0.1	47.5	0.318	48.8667
2	1.62	0.05	47.5	0.256	66.5367
3	1.77	0.05	57	0.333	66.0125
4	1.77	0.05	57	0.356	70.5719
Figure 7B (RT-qPCR 2020.06.16)
Sample	Cq	Starting quantity (SQ)						Sample	Cq	Starting quantity (SQ)						Sample	Cq	Starting quantity (SQ)
Standard 1 (epsB)	12.94	1000000						Standard 1 (tasA)	13.98	1000000						Standard 1 (gyrA)	12.81	1000000
Standard 2 (epsB)	14.43	333333						Standard 2 (tasA)	15.57	333333						Standard 2 (gyrA)	14.62	333333
Standard 3 (epsB)	15.95	111111						Standard 3 (tasA)	17.07	111111						Standard 3 (gyrA)	16.02	111111
Standard 4 (epsB)	17.63	37037						Standard 4 (tasA)	18.65	37037						Standard 4 (gyrA)	17.55	37037
Standard 5 (epsB)	19.14	12345.7						Standard 5 (tasA)	20.27	12345.7						Standard 5 (gyrA)	19.19	12345.7
Standard 6 (epsB)	20.83	4115.23						Standard 6 (tasA)	22.04	4115.23						Standard 6 (gyrA)	20.7	4115.23
Standard 7 (epsB)	22.36	1371.74						Standard 7 (tasA)	23.4	1371.74						Standard 7 (gyrA)	22.29	1371.74
Standard 8 (epsB)	24.04	457.247						Standard 8 (tasA)	25.08	457.247						Standard 8 (gyrA)	23.99	457.247
Standard 9 (epsB)	25.78	152.416						Standard 9 (tasA)	26.76	152.416						Standard 9 (gyrA)	25.55	152.416
Standard 10 (epsB)	27.12	50.8053						Standard 10 (tasA)	28.25	50.8053						Standard 10 (gyrA)	27.3	50.8053
Standard 11 (epsB)	29.15	16.9351						Standard 11 (tasA)	30.05	16.9351						Standard 11 (gyrA)	29.05	16.9351
	Starting quantity (SQ)								Starting quantity (SQ)								Starting quantity (SQ)
Sample (strain/target/+-RT/time)	Tech. rep 1	Tech. rep 2	Tech. rep 3	Avg. SQ	Standard deviation			Sample (strain/target/+-RT/time)	Tech. rep 1	Tech. rep 2	Tech. rep 3	Avg. SQ	Standard deviation			Sample (strain/target/+-RT/time)	Tech. rep 1	Tech. rep 2	Tech. rep 3	Avg. SQ	Standard deviation
JMJ725/epsB/+RT/-1.2 hours	759.786	799.936	791.928	783.884	21.2494			JMJ725/tasA/+RT/-1.2 hours	4404.75	4328	4549.92	4427.55	112.704			JMJ725/gyrA/+RT/-1.2 hours	1745.87	1912.11	1938.01	1865.33	104.261
JMJ725/epsB/+RT/0 hours	856.969	838.425	937.421	877.605	52.6257			JMJ725/tasA/+RT/0 hours	4537.11	5161.09	4974.4	4890.87	320.263			JMJ725/gyrA/+RT/0 hours	3207.55	2297.6	3342.41	2949.19	568.307
JMJ725/epsB/+RT/1 hours	914.14	936.969	935.426	928.845	12.7585			JMJ725/tasA/+RT/1 hours	4264.19	4338.78	4770.14	4457.7	273.137			JMJ725/gyrA/+RT/1 hours	2341.23	2446.09	2268.89	2352.07	89.0974
JMJ725/epsB/+RT/2 hours	640.122	599.668	575.437	605.075	32.6797			JMJ725/tasA/+RT/2 hours	3597.53	3438.14	3354.39	3463.35	123.517			JMJ725/gyrA/+RT/2 hours	1268.95	1236.56	1070.15	1191.89	106.666
JMJ727/epsB/+RT/-1.2 hours	949.108	941.233	997.746	962.695	30.6088			JMJ727/tasA/+RT/-1.2 hours	4793.44	5327.29	4961.2	5027.31	272.992			JMJ727/gyrA/+RT/-1.2 hours	2182.05	2347.01	2496.51	2341.86	157.296
JMJ727/epsB/+RT/0 hours	1201.9	1227.46	1207.88	1212.42	13.3657			JMJ727/tasA/+RT/0 hours	6407.08	6447.6	6776.89	6543.86	202.823			JMJ727/gyrA/+RT/0 hours	2350.92	2287.03	2241.24	2293.06	55.0869
JMJ727/epsB/+RT/1 hours	1437.2	1386.48	1362.67	1395.45	38.0698			JMJ727/tasA/+RT/1 hours	6833.94	6847.06	7060.06	6913.69	126.934			JMJ727/gyrA/+RT/1 hours	2135.11	2156.2	2121.91	2137.74	17.294
JMJ727/epsB/+RT/2 hours	3362.47	3078.13	3215.7	3218.76	142.195			JMJ727/tasA/+RT/2 hours	13436.6	12403.1	12851.6	12897.1	518.249			JMJ727/gyrA/+RT/2 hours	1666.34	1609.52	1588.49	1621.45	40.2685
JMJ725/epsB/-RT/-1.2 hours	22.0868	21.584	22.0375	21.9028	0.277186			JMJ725/tasA/-RT/-1.2 hours	49.0921	50.998	50.2646	50.1183	0.961329			JMJ725/gyrA/-RT/-1.2 hours	38.4268	43.556	38.8873	40.29	2.83779
JMJ725/epsB/-RT/0 hours	29.6439	29.4957	30.5186	29.8861	0.552795			JMJ725/tasA/-RT/0 hours	57.9473	60.6388	61.1275	59.9045	1.71254			JMJ725/gyrA/-RT/0 hours	45.7444	50.5885	46.618	47.6503	2.58177
JMJ725/epsB/-RT/1 hours	133.333	136.376	129.477	133.062	3.45742			JMJ725/tasA/-RT/1 hours	260.769	255.623	249.892	255.428	5.4411			JMJ725/gyrA/-RT/1 hours	158.135	171.669	175.839	168.548	9.25515
JMJ725/epsB/-RT/2 hours	164.039	159.509	165.1	162.883	2.96948			JMJ725/tasA/-RT/2 hours	313.758	316.888	318.533	316.393	2.42557			JMJ725/gyrA/-RT/2 hours	180.069	190.035	186.847	185.65	5.08941
JMJ727/epsB/-RT/-1.2 hours	33.8138	38.1796	36.538	36.1771	2.20516			JMJ727/tasA/-RT/-1.2 hours	71.8333	75.5381	74.2448	73.872	1.88032			JMJ727/gyrA/-RT/-1.2 hours	56.4194	62.6503	64.1797	61.0831	4.11068
JMJ727/epsB/-RT/0 hours	49.7508	49.2479	49.7027	49.5671	0.277514			JMJ727/tasA/-RT/0 hours	81.5687	85.5873	97.1749	88.1103	8.10319			JMJ727/gyrA/-RT/0 hours	61.8566	63.9518	64.5962	63.4682	1.4324
JMJ727/epsB/-RT/1 hours	176.453	168.161	168.156	170.923	4.78917			JMJ727/tasA/-RT/1 hours	320.912	322.611	309.699	317.741	7.01577			JMJ727/gyrA/-RT/1 hours	221.69	216.109	215.358	217.719	3.45977
JMJ727/epsB/-RT/2 hours	84.6354	88.7982	84.0892	85.8409	2.57561			JMJ727/tasA/-RT/2 hours	175.437	166.819	164.937	169.064	5.59832			JMJ727/gyrA/-RT/2 hours	112.126	110.848	108.301	110.425	1.94709
Sample (strain/target/time)	(+RT) - (-RT)							Sample (strain/target/time)	(+RT) - (-RT)							Sample (strain/target/time)	(+RT) - (-RT)
JMJ725/epsB/-1.2 hours	761.981							JMJ725/tasA/-1.2 hours	4377.44							JMJ725/gyrA/-1.2 hours	1825.04
JMJ725/epsB/0 hours	847.719							JMJ725/tasA/0 hours	4830.96							JMJ725/gyrA/0 hours	2901.54
JMJ725/epsB/1 hours	795.783							JMJ725/tasA/1 hours	4202.27							JMJ725/gyrA/1 hours	2183.52
JMJ725/epsB/2 hours	442.193							JMJ725/tasA/2 hours	3146.96							JMJ725/gyrA/2 hours	1006.24
JMJ727/epsB/-1.2 hours	926.518							JMJ727/tasA/-1.2 hours	4953.44							JMJ727/gyrA/-1.2 hours	2280.77
JMJ727/epsB/0 hours	1162.85							JMJ727/tasA/0 hours	6455.75							JMJ727/gyrA/0 hours	2229.6
JMJ727/epsB/1 hours	1224.53							JMJ727/tasA/1 hours	6595.94							JMJ727/gyrA/1 hours	1920.02
JMJ727/epsB/2 hours	3132.92							JMJ727/tasA/2 hours	12728.1							JMJ727/gyrA/2 hours	1511.03
Sample	Normalized to gyrA
JMJ725/epsB/-1.2 hours	0.417515
JMJ725/epsB/0 hours	0.292162
JMJ725/epsB/1 hours	0.364449
JMJ725/epsB/2 hours	0.439452
JMJ727/epsB/-1.2 hours	0.40623
JMJ727/epsB/0 hours	0.521551
JMJ727/epsB/1 hours	0.637767
JMJ727/epsB/2 hours	2.07337
JMJ725/tasA/-1.2 hours	2.39855
JMJ725/tasA/0 hours	1.66497
JMJ725/tasA/1 hours	1.92454
JMJ725/tasA/2 hours	3.12745
JMJ727/tasA/-1.2 hours	2.17182
JMJ727/tasA/0 hours	2.89548
JMJ727/tasA/1 hours	3.43535
JMJ727/tasA/2 hours	8.42346
epsB/gyrA normalized to JMJ727 at -1.2 hours
Time (hours)	JMJ725 (devI+)	JMJ727 (devI-)
-1.2	1.02778	1
0	0.719204	1.28388
1	0.897149	1.56997
2	1.08178	5.10395
tasA/gyrA normalized to JMJ727 at -1.2 hours
Time (hours)	JMJ725 (devI+)	JMJ727 (devI-)
-1.2	1.10439	1
0	0.766622	1.3332
1	0.886139	1.58178
2	1.44001	3.87852
