# Supplementary material for: A mobile genetic element increases bacterial host fitness by manipulating development
Source: eLife. 2021 Mar 3;10:e65924. doi: 10.7554/eLife.65924 (PMC8032392; doi:10.7554/eLife.65924)
Supplement: Source data 1. — Counts of two ICEBs1-cured strains each bearing an antibiotic resistance marker (used to distinguish strains) at the start and end of competitions. [file elife-65924-data1.xlsx]

## Sheet: Results in main text (no fig.)
Section: ICEBs1 provides a frequency-dependent selective advantage in biofilms
"There was a small cost associated with the marker used to select cells containing ICEBs1 (relative fitness 0.7 ± 0.09)..."
Replicate 1 (2019.08.23)
	Initial JMJ574 CFU/ml (plating rep 1)	Initial JMJ550 CFU/ml (plating rep 1)	Initial JMJ574 CFU/ml (plating rep 2)	Initial JMJ550 CFU/ml (plating rep 2)	Avg. Initial JMJ574 frequency	Final JMJ574 CFU/ml	Final JMJ550 CFU/ml	Total CFU/ml	Final JMJ574 frequency	JMJ574 Relative fitness
JMJ574 0.01 JMJ550 0.99 MSgg biofilm rep 1	32000	2750000	27400	2710000	0.010756	9400000	1490000000	1499400000	0.00626917	0.580222
JMJ574 0.01 JMJ550 0.99 MSgg biofilm rep 2	32000	2750000	27400	2710000	0.010756	10700000	1460000000	1470700000	0.00727545	0.674036
JMJ574 0.01 JMJ550 0.99 MSgg biofilm rep 3	32000	2750000	27400	2710000	0.010756	11300000	1680000000	1691300000	0.00668125	0.618617
Replicate 2 (2019.08.28)
	Initial JMJ574 CFU/ml (plating rep 1)	Initial JMJ550 CFU/ml (plating rep 1)	Initial JMJ574 CFU/ml (plating rep 2)	Initial JMJ550 CFU/ml (plating rep 2)	Avg. Initial JMJ574 frequency	Final JMJ574 CFU/ml	Final JMJ550 CFU/ml	Total CFU/ml	Final JMJ574 frequency	JMJ574 Relative fitness
JMJ574 0.01 JMJ550 0.99 MSgg biofilm rep 1	26800	2690000	25000	2550000	0.00978664	15000000	1760000000	1775000000	0.0084507	0.86233
JMJ574 0.01 JMJ550 0.99 MSgg biofilm rep 2	26800	2690000	25000	2550000	0.00978664	11800000	1450000000	1461800000	0.00807224	0.823397
JMJ574 0.01 JMJ550 0.99 MSgg biofilm rep 3	26800	2690000	25000	2550000	0.00978664	12300000	1850000000	1862300000	0.00660474	0.672711
Replicate 3 (2019.09.05)
	Initial JMJ574 CFU/ml (plating rep 1)	Initial JMJ550 CFU/ml (plating rep 1)	Initial JMJ574 CFU/ml (plating rep 2)	Initial JMJ550 CFU/ml (plating rep 2)	Avg. Initial JMJ574 frequency	Final JMJ574 CFU/ml	Final JMJ550 CFU/ml	Total CFU/ml	Final JMJ574 frequency	JMJ574 Relative fitness
JMJ574 0.01 JMJ550 0.99 MSgg biofilm rep 1	33500	2990000	35100	2870000	0.011581	10300000	1260000000	1270300000	0.00810832	0.697686
JMJ574 0.01 JMJ550 0.99 MSgg biofilm rep 2	33500	2990000	35100	2870000	0.011581	13600000	1460000000	1473600000	0.0092291	0.795023
JMJ574 0.01 JMJ550 0.99 MSgg biofilm rep 3	33500	2990000	35100	2870000	0.011581	10900000	1290000000	1300900000	0.00837881	0.721158
JMJ574 median relative fitness	0.697686
Standard deviation	0.0942784
