# Supplementary material for: A mobile genetic element increases bacterial host fitness by manipulating development
Source: eLife. 2021 Mar 3;10:e65924. doi: 10.7554/eLife.65924 (PMC8032392; doi:10.7554/eLife.65924)
Supplement: Table 1—source data 1. — Counts of donors, recipients, and transconjugants for ICEBs1 mating in biofilms. [file elife-65924-table1-data1.xlsx]

## Sheet: Table 1
Replicate 1 2019.03.27
	Initial ICE+ CFU/ml (plating rep 1)	Initial ICE0 CFU/ml (plating rep 1)	Initial ICE+ CFU/ml (plating rep 2)	Initial ICE0 CFU/ml (plating rep 2)	Avg. Initial ICE+ frequency	Final ICE+ (CFU/ml)	Final ICE0 (CFU/ml)	Final TC (CFU/ml)	Total CFU/ml	Final ICE+ frequency	Final ICE0 frequency	Final TC frequency
JMJ592 0.01 JMJ550 0.99 MSgg biofilm rep 1	14400	1710000	14300	1780000	0.00816021	13900000	1050000000	660000000	1723900000	0.00806311	0.609084	0.382853
JMJ592 0.01 JMJ550 0.99 MSgg biofilm rep 2	14400	1710000	14300	1780000	0.00816021	12600000	1080000000	410000000	1502600000	0.00838547	0.718754	0.27286
JMJ592 0.01 JMJ550 0.99 MSgg biofilm rep 3	14400	1710000	14300	1780000	0.00816021	23900000	1080000000	540000000	1643900000	0.0145386	0.656974	0.328487
JMJ592 0.1 JMJ550 0.9 MSgg biofilm rep 1	153000	1650000	166000	1520000	0.0916582	87000000	670000000	770000000	1527000000	0.0569745	0.438769	0.504257
JMJ592 0.1 JMJ550 0.9 MSgg biofilm rep 2	153000	1650000	166000	1520000	0.0916582	92000000	690000000	860000000	1642000000	0.0560292	0.420219	0.523752
JMJ592 0.1 JMJ550 0.9 MSgg biofilm rep 3	153000	1650000	166000	1520000	0.0916582	108000000	570000000	700000000	1378000000	0.0783745	0.413643	0.507983
JMJ592 0.5 JMJ550 0.5 MSgg biofilm rep 1	620000	900000	640000	720000	0.439241	550000000	310000000	720000000	1580000000	0.348101	0.196203	0.455696
JMJ592 0.5 JMJ550 0.5 MSgg biofilm rep 2	620000	900000	640000	720000	0.439241	600000000	530000000	510000000	1640000000	0.365854	0.323171	0.310976
JMJ592 0.5 JMJ550 0.5 MSgg biofilm rep 3	620000	900000	640000	720000	0.439241	400000000	460000000	540000000	1400000000	0.285714	0.328571	0.385714
JMJ592 0.9 JMJ550 0.1 MSgg biofilm rep 1	1130000	156000	1030000	158000	0.872848	1210000000	142000000	107000000	1459000000	0.829335	0.0973269	0.0733379
JMJ592 0.9 JMJ550 0.1 MSgg biofilm rep 2	1130000	156000	1030000	158000	0.872848	1210000000	169000000	86000000	1465000000	0.825939	0.115358	0.0587031
JMJ592 0.9 JMJ550 0.1 MSgg biofilm rep 3	1130000	156000	1030000	158000	0.872848	1460000000	166000000	93000000	1719000000	0.849331	0.0965678	0.0541012
Replicate 2 2019.03.28
	Initial ICE+ CFU/ml (plating rep 1)	Initial ICE0 CFU/ml (plating rep 1)	Initial ICE+ CFU/ml (plating rep 2)	Initial ICE0 CFU/ml (plating rep 2)	Avg. Initial ICE+ frequency	Final ICE+ (CFU/ml)	Final ICE0 (CFU/ml)	Final TC (CFU/ml)	Total CFU/ml	Final ICE+ frequency	Final ICE0 frequency	Final TC frequency
JMJ592 0.01 JMJ550 0.99 MSgg biofilm rep 1	4200	700000	4400	560000	0.00688005	11300000	890000000	590000000	1491300000	0.00757728	0.596795	0.395628
JMJ592 0.01 JMJ550 0.99 MSgg biofilm rep 2	4200	700000	4400	560000	0.00688005	11900000	400000000	820000000	1231900000	0.00965987	0.324702	0.665638
JMJ592 0.01 JMJ550 0.99 MSgg biofilm rep 3	4200	700000	4400	560000	0.00688005	8600000	600000000	820000000	1428600000	0.00601988	0.419992	0.573989
JMJ592 0.1 JMJ550 0.9 MSgg biofilm rep 1	34000	390000	33000	430000	0.0757315	53000000	590000000	1090000000	1733000000	0.0305828	0.34045	0.628967
JMJ592 0.1 JMJ550 0.9 MSgg biofilm rep 2	34000	390000	33000	430000	0.0757315	51000000	690000000	980000000	1721000000	0.0296339	0.40093	0.569436
JMJ592 0.1 JMJ550 0.9 MSgg biofilm rep 3	34000	390000	33000	430000	0.0757315	83000000	480000000	1000000000	1563000000	0.053103	0.307102	0.639795
JMJ592 0.5 JMJ550 0.5 MSgg biofilm rep 1	145000	181000	148000	191000	0.440682	460000000	200000000	800000000	1460000000	0.315068	0.136986	0.547945
JMJ592 0.5 JMJ550 0.5 MSgg biofilm rep 2	145000	181000	148000	191000	0.440682	500000000	320000000	730000000	1550000000	0.322581	0.206452	0.470968
JMJ592 0.5 JMJ550 0.5 MSgg biofilm rep 3	145000	181000	148000	191000	0.440682	470000000	360000000	620000000	1450000000	0.324138	0.248276	0.427586
JMJ592 0.9 JMJ550 0.1 MSgg biofilm rep 1	220000	27000	170000	30000	0.870344	1230000000	281000000	99000000	1610000000	0.763975	0.174534	0.0614907
JMJ592 0.9 JMJ550 0.1 MSgg biofilm rep 2	220000	27000	170000	30000	0.870344	1090000000	238000000	112000000	1440000000	0.756944	0.165278	0.0777778
JMJ592 0.9 JMJ550 0.1 MSgg biofilm rep 3	220000	27000	170000	30000	0.870344	1420000000	277000000	113000000	1810000000	0.78453	0.153039	0.0624309
Replicate 3 2019.03.29
	Initial ICE+ CFU/ml (plating rep 1)	Initial ICE0 CFU/ml (plating rep 1)	Initial ICE+ CFU/ml (plating rep 2)	Initial ICE0 CFU/ml (plating rep 2)	Avg. Initial ICE+ frequency	Final ICE+ (CFU/ml)	Final ICE0 (CFU/ml)	Final TC (CFU/ml)	Total CFU/ml	Final ICE+ frequency	Final ICE0 frequency	Final TC frequency
JMJ592 0.01 JMJ550 0.99 MSgg biofilm rep 1	25400	1880000	15500	2020000	0.0104727	12700000	800000000	650000000	1462700000	0.00868257	0.546934	0.444384
JMJ592 0.01 JMJ550 0.99 MSgg biofilm rep 2	25400	1880000	15500	2020000	0.0104727	12200000	1310000000	500000000	1822200000	0.0066952	0.718911	0.274394
JMJ592 0.01 JMJ550 0.99 MSgg biofilm rep 3	25400	1880000	15500	2020000	0.0104727	12600000	1050000000	710000000	1772600000	0.0071082	0.59235	0.400542
JMJ592 0.1 JMJ550 0.9 MSgg biofilm rep 1	231000	1640000	254000	1670000	0.12774	74000000	250000000	1200000000	1524000000	0.0485564	0.164042	0.787402
JMJ592 0.1 JMJ550 0.9 MSgg biofilm rep 2	231000	1640000	254000	1670000	0.12774	101000000	610000000	1000000000	1711000000	0.0590298	0.356517	0.584454
JMJ592 0.1 JMJ550 0.9 MSgg biofilm rep 3	231000	1640000	254000	1670000	0.12774	75000000	0	1280000000	1355000000	0.0553506	0	0.944649
JMJ592 0.5 JMJ550 0.5 MSgg biofilm rep 1	920000	900000	940000	760000	0.529218	580000000	420000000	820000000	1820000000	0.318681	0.230769	0.450549
JMJ592 0.5 JMJ550 0.5 MSgg biofilm rep 2	920000	900000	940000	760000	0.529218	400000000	340000000	660000000	1400000000	0.285714	0.242857	0.471429
JMJ592 0.5 JMJ550 0.5 MSgg biofilm rep 3	920000	900000	940000	760000	0.529218	600000000	450000000	960000000	2010000000	0.298507	0.223881	0.477612
JMJ592 0.9 JMJ550 0.1 MSgg biofilm rep 1	1890000	140000	1820000	140000	0.929803	1390000000	152000000	105000000	1647000000	0.843959	0.092289	0.0637523
JMJ592 0.9 JMJ550 0.1 MSgg biofilm rep 2	1890000	140000	1820000	140000	0.929803	1260000000	189000000	100000000	1549000000	0.813428	0.122014	0.0645578
JMJ592 0.9 JMJ550 0.1 MSgg biofilm rep 3	1890000	140000	1820000	140000	0.929803	1460000000	188000000	95000000	1743000000	0.837636	0.10786	0.0545037
Summary (Table 1)
	Avg. initial ICE+ frequency	standard deviation	Avg. final TC frequency	standard deviation
JMJ592 0.01 JMJ550 0.99 MSgg	0.00850431	0.00182087	0.415419	0.131356
JMJ592 0.1 JMJ550 0.9 MSgg	0.0983766	0.0266472	0.632299	0.146441
JMJ592 0.5 JMJ550 0.5 MSgg	0.469714	0.0515371	0.444275	0.0661013
JMJ592 0.9 JMJ550 0.1 MSgg	0.890999	0.0336289	0.0634062	0.00789939
